# Supplementary material for: Ferritin-catalyzed synthesis of ferrihydrite nanoparticles with high mimetic peroxidase activity for biomolecule detection
Source: Royal Society of Chemistry journal article supplement (doi:10.1039/d1ra03816h), 2021-01-01
Supplement: d1ra03816h1.pdf [file d1ra03816h1.pdf]

## Supporting Information

for

### **Ferritin-catalyzed synthesis of ferrihydrite nanoparticles with high mimetic peroxidase activity for biomolecules detection**

Hai Chen,\* Liang Ma and Yuhao Zhang\*

College of Food Science, Southwest University, Chongqing, 400715, China

## Supplementary Figures (Figs. S1-S5)

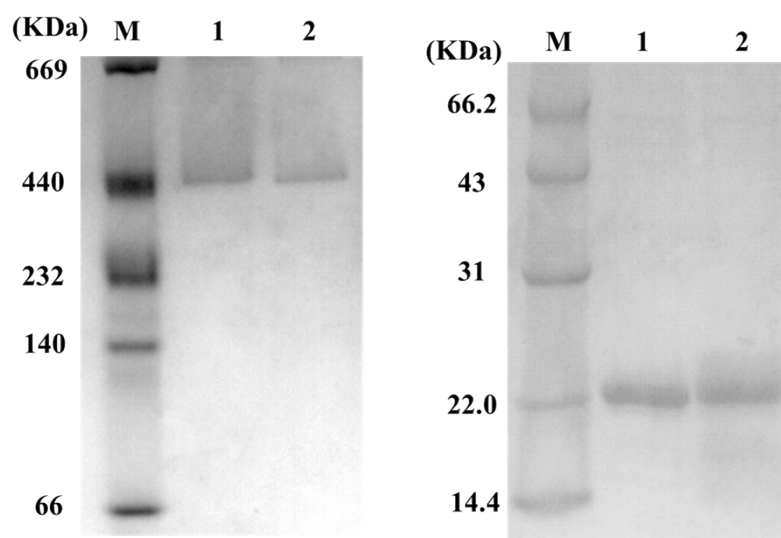

**Figure S1.** (a) SDS-PAGE and (b) Native-PAGE analyses. Land M, protein markers and their corresponding molecular masses; Land 1, purified rHuHF; Land 2, holo rHuHF with loading 800 iron/protein within the inner cavity.

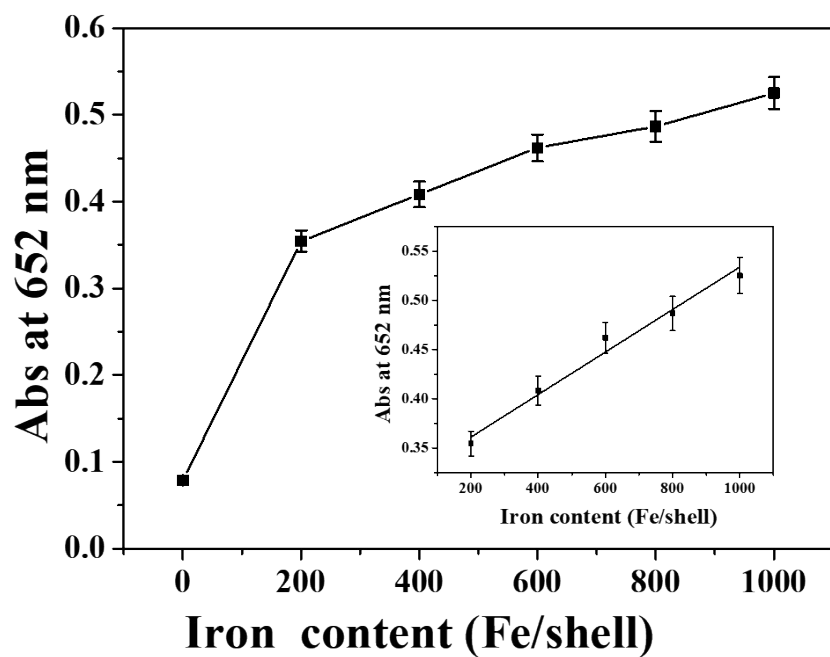

**Figure S2.** Relationship between the absorbance at 652 nm and the iron content. Insert: A near linear relationship between the absorbance at 652 nm and the iron content. Conditions: 1.0 mM TMB, 10 mM H<sub>2</sub>O<sub>2</sub>, and [apo ferritin or f<sub>s</sub>FNs] = 0.25 μM.

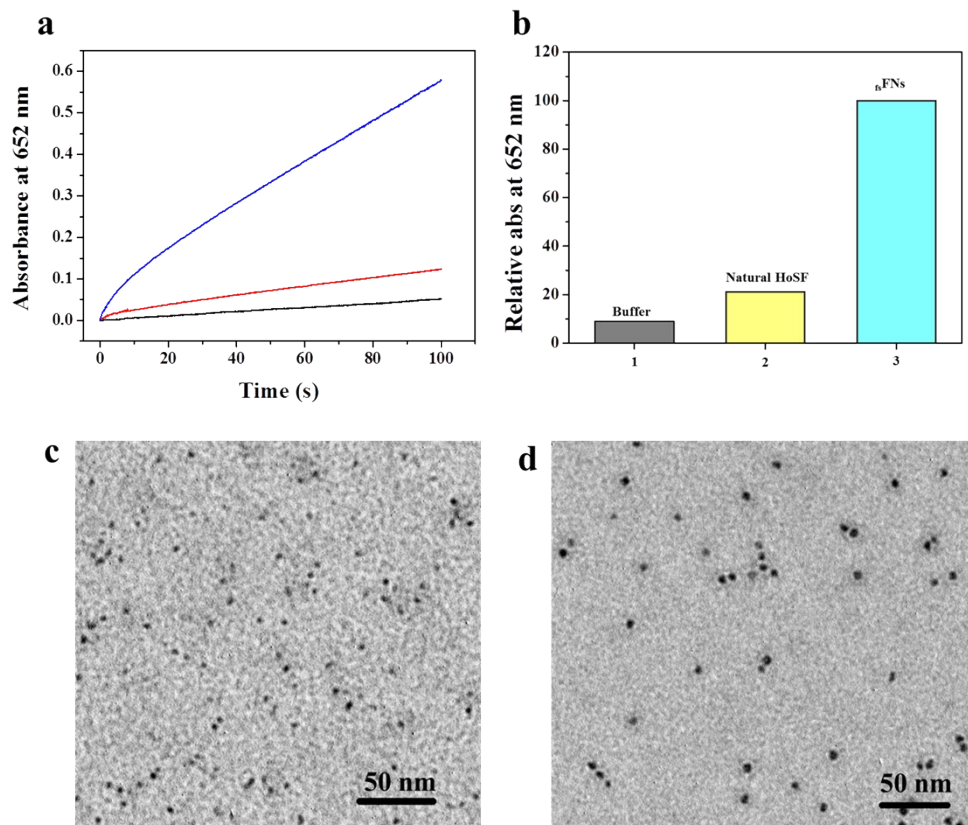

**Figure S3.** Comparison of the catalytic activity between natural holo horse spleen ferritin (HoSF) and  $f_s$ FNs. (a) Time-dependence absorbance changes at 652 nm of buffer (black),  $f_s$ FNs (blue) and natural holo HoSF (red). (b) Relative catalytic activity of buffer,  $f_s$ FNs and natural holo HoSF with respect to 100% absorbance assumed for  $f_s$ FNs at 652 nm. TEM images of  $f_s$ FNs containing 800 iron/shell (c) and natural holo HoSF (d) without uranyl acetate staining.

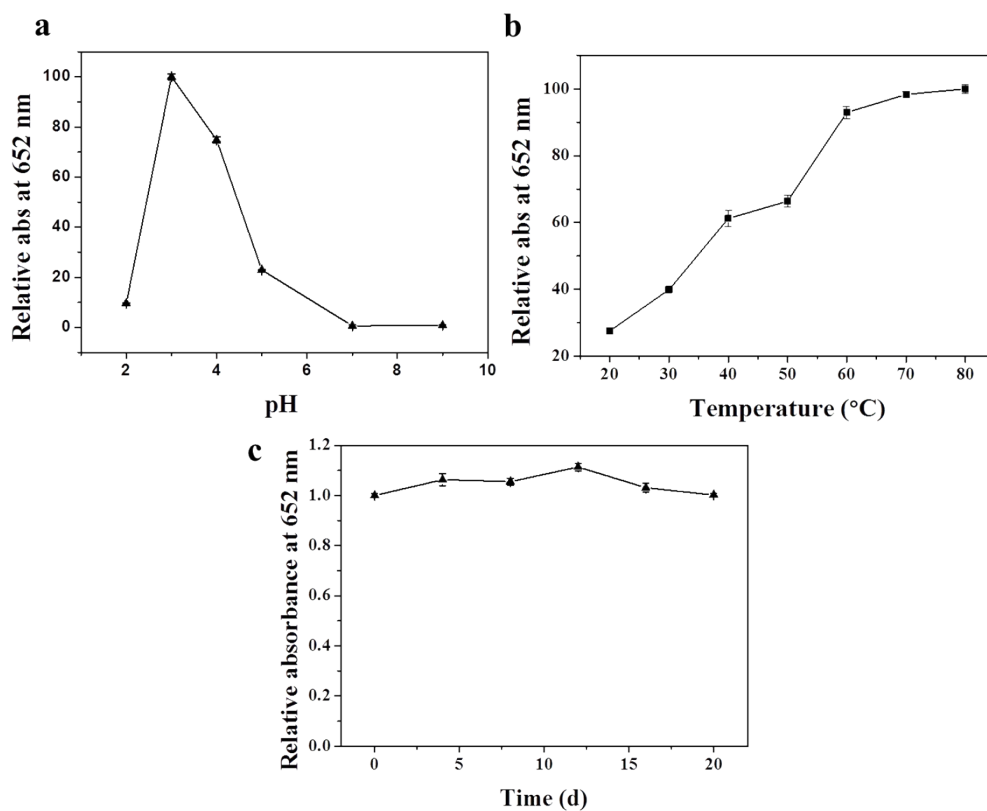

**Figure S4.** Effect of different experimental conditions on the peroxidase-like activity of  $f_s$ FNs, which include (a) pH value, (b) temperature, and (c) storage time. Conditions: 1.0 mM TMB, 10 mM  $H_2O_2$ , and  $[f_sFNs] = 0.25 \mu M$ .

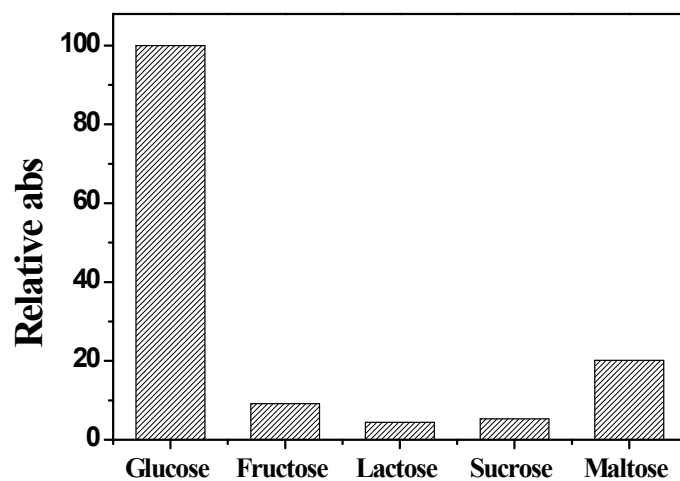

**Figure S5.** Determination of the selectivity for glucose detection. The concentration of glucose and fructose, lactose, sucrose, and maltose are 80  $\mu$ M.

## Supplementary table

**Table 1.** Comparison of kinetic parameters of TMB oxidation by  $f_s$ FNs and HRP.

| Catalyst                                               | Substrate                     | $V_{max}$ (M s <sup>-1</sup> ) | $K_m$ (M)              | Ref.      |
|--------------------------------------------------------|-------------------------------|--------------------------------|------------------------|-----------|
| $f_s$ FNs                                              | TMB                           | $4.4 \times 10^{-7}$           | $4.5 \times 10^{-4}$   | This work |
| $f_s$ FNs                                              | H <sub>2</sub> O <sub>2</sub> | $4.5 \times 10^{-8}$           | $3.1 \times 10^{-5}$   | This work |
| HRP                                                    | TMB                           | $3.3 \times 10^{-8}$           | $3.2 \times 10^{-4}$   | [1]       |
| HRP                                                    | H <sub>2</sub> O <sub>2</sub> | $2.4 \times 10^{-8}$           | $5.5 \times 10^{-5}$   | [1]       |
| Au-Ft                                                  | TMB                           | $7.5 \times 10^{-8}$           | $9.7 \times 10^{-5}$   | [2]       |
| Au-Ft                                                  | H <sub>2</sub> O <sub>2</sub> | $9.3 \times 10^{-8}$           | $199.4 \times 10^{-3}$ | [2]       |
| Pt-Ft                                                  | TMB                           | $5.6 \times 10^{-7}$           | $2.2 \times 10^{-4}$   | [3]       |
| Pt-Ft                                                  | H <sub>2</sub> O <sub>2</sub> | $3.2 \times 10^{-4}$           | $187.3 \times 10^{-3}$ | [3]       |
| M-HFn-Co <sub>x</sub> Fe <sub>3-x</sub> O <sub>4</sub> | TMB                           | $1.3 \times 10^{-8}$           | $1.3 \times 10^{-4}$   | [4]       |
| M-HFn-Co <sub>x</sub> Fe <sub>3-x</sub> O <sub>4</sub> | H <sub>2</sub> O <sub>2</sub> | $0.7 \times 10^{-8}$           | $17.0 \times 10^{-3}$  | [4]       |
| Fe <sub>3</sub> O <sub>4</sub> MNPs                    | TMB                           | $3.4 \times 10^{-8}$           | $9.8 \times 10^{-5}$   | [5]       |
| Fe <sub>3</sub> O <sub>4</sub> MNPs                    | H <sub>2</sub> O <sub>2</sub> | $9.8 \times 10^{-8}$           | $154 \times 10^{-3}$   | [5]       |

## References

1. Y. L. Liu, X. J. Zhao, X. X. Yang and Y. F. Li, *Analyst*, 2013, **138**, 4526.
2. F. Jia, J. J. Yin, N. Bo, X. Wu, H. Ye, M. Ferrari, G. J. Anderson, J. Wei, Y. Zhao, and G. Nie, *Biomaterials*, 2011, **32**, 1611.
3. X. Jiang, C. Sun, Y. Guo, G. Nie, and L. Xu, *Biosens. Bioelectron.*, 2015, **64**, 165-170.
4. T. Zhang, C. Cao, T. Xu, C. Yao, & Y. Pan, *Nanotechnology*, 2016, **28**, 045704.
5. L. Gao, J. Zhuang, L. Nie, J. Zhang, Y. Zhang, N. Gu, T. Wang, J. Feng, D. Yang, S. Perrett & X. Yan, *Nat. Nanotechnol.*, 2007, **2**, 577.
